# Supplementary material for: Harnessing Futures Thinking: Fostering Moral Foresight and Imagination in Higher Education
Source: Research Square preprint supplement (doi:10.21203/rs.3.rs-7047513/v1), 2025-10-31
Supplement: Supplementary file 1 [file 87baa79aa6f819589b66796b.docx]

**Definitions of 12 Essential Futures Tools and the Scenario Planning Framework Appendices A**

| **Ser** | **Tool Description** | **Citations** |
| --- | --- | --- |
| 1 | **Archetype** **Scenarios** are global narrative templates that represent plausible alternative futures (Dator, 2020). Typically structured around four recurring patterns: continued growth, collapse, disciplined society, and transformation. They offer a conceptual framework for organizing diverse driving forces and emerging issues into distinct future outcomes (Fergnani & Jackson, 2019). | Dator J. (2020). The Manoa school’s four futures. In: Slaughter R., Hines A. (eds.), *Knowledge Base of Futures Studies*. Association of Professional Futurists and Foresight International, pp. 109–119.  Fergnani A., Jackson M. (2019). Extracting scenario archetypes: A quantitative text analysis of documents about the future. *Futures & Foresight Science*, **1**(1), 1–12. doi:10.1002/ffo2.2 |
| 2. | **Backcasting** is a normative foresight method that begins by establishing a vision of a desirable future and then works backward to identify the goals, strategies, and policy measures required to achieve it (Dreborg, 1996). Unlike forecasting, which extrapolates from present trends, backcasting (*reverse extrapolation*) focuses on transformative change by asking: “What must we do today to realise a preferred tomorrow?”  The process typically unfolds in three structured phases:   1. Visioning Phase    1. Define a clear and compelling image of the desired future.    2. Engage stakeholders to articulate long-term goals and values. 2. Policy Packaging Phase    1. Identify and organise policy measures into coherent packages.    2. Sequence actions over time to bridge the gap between present conditions and the envisioned future. 3. Appraisal Phase    1. Evaluate proposed policies for feasibility, effectiveness, and social acceptability.    2. Anticipate potential barriers to implementation and refine strategies accordingly. | Bibri, S. E. (2018). Backcasting in futures studies: A synthesized scholarly and planning approach to strategic smart sustainable city development. *European Journal of Futures Research*, **6**(13), 1–27. https://doi.org/10.1186/s40309-018-0142-z  Dreborg, K. H. (1996). Essence of backcasting. *Futures*, **28**(9), 813–828. https://doi.org/10.1016/S0016-3287(96)00044-4  Soria-Lara, J. A., & Banister, D. (2017). Participatory visioning in transport backcasting studies: Methodological lessons from Andalusia (Spain). *Journal of Transport Geography*, **58**, 113–126. https://doi.org/10.1016/j.jtrangeo.2016.11.012 |
| 3. | **Branch Analysis** is a scenario-building method that explores path-dependent outcomes by systematically identifying key events and mapping their consequences onto a branching diagram (Rhydderch, 2009). It supports the development of plausible futures by examining critical questions and the cascading impacts of decisions or occurrences. This technique is especially effective for scenarios cantered on known turning points, such as elections, referendums, or peace negotiations, where multiple outcomes are possible within a short- to medium-term horizon (Rhydderch, 2009). | Rhydderch, A. (2009). Scenario planning: Guidance notes. Foresight Horizon Scanning Centre, Government Office for Science. Available via Global Interagency Security Forum  Postma, T. J. B. M., & Liebl, F. (2005). How to improve scenario analysis as a strategic management tool? Technological Forecasting and Social Change, 72(2), 161–173. https://doi.org/10.1016/j.techfore.2003.11.005 |
| 4. | **Driver Mapping:** is a foresight tool used to identify and assess the most influential forces of change, called *drivers,* within a system or context. These drivers are typically trends or emerging issues that could shape future developments.   1. Drivers are gathered through horizon scanning and categorized using frameworks like **PESTLE** (Political, Economic, Social, Technological, Legal, Environmental). 2. They are then plotted on an **uncertainty-impact matrix**, which helps evaluate how uncertain and impactful each driver is. 3. This process reveals **critical uncertainties,** drivers that are both highly impactful and unpredictable, which are essential for developing robust future scenarios | Government Office for Science. (2024). The Futures Toolkit: Tools for strategic foresight and scenario planning. GOV.UK. Retrieved from Futures Toolkit for policymakers and analysts  Petersen, J. L. (1999). Out of the Blue: How to Anticipate Big Future Surprises. Madison Books, Lanham, MD.  UK Government. (2018). The Futures Toolkit: Tools for Futures Thinking and Foresight Across UK Government. Government Office for Science. Retrieved from Embedding Project resource  Wade, W. (2012). Scenario Planning: A Field Guide to the Future. John Wiley & Sons. |
| 5 | **Future Wheel:** “smart group” method that uses a structured brainstorming process to uncover and evaluate multiple levels of consequences resulting from all types of change. The output is a map of possible direct and indirect, positive and negative impacts that can be analyzed to develop strategies to promote desirable consequences and avoid undesirable ones (Bengston, 2016).  It is used for identifying and packaging primary, secondary, & tertiary consequences of trends, events, emerging issues, and future possible decisions (Inayatullah, 2008). It can help to understand the potential consequences of science-related developments (BouJaoude 2000). | Bengston, D. N. (2016). The Futures Wheel: A method for exploring the implications of social–ecological change. Society & Natural Resources, 29(3), 374–379. https://doi.org/10.1080/08941920.2015.1054980  BouJaoude, S. B. (2000). What might happen if ...? The Science Teacher, 67(4), 44–47.  Inayatullah, S. (2008). Six pillars: Future thinking for transformation. Foresight, 10(1), 4–21. https://doi.org/10.1108/14636680810855991 |
| 6 | **Roadmapping** is a structured, yet flexible decision-support method used to navigate uncertainty and guide strategic implementation. It operates as a post-scenario tool that visualises and evaluates layered information across time (Lizaso & Reger, 2004), integrating diverse perspectives and causal pathways to identify opportunities for action.  It consists of:   1. A process: collaborative dialogue among stakeholders (Grossman, 2004) 2. A product: a visual roadmap representing strategic pathways 3. It helps foster a shared vision and supports strategic alignment by making assumptions, priorities, and implementation steps explicit (Phaal et al., 2009). | Grossman, D. S. (2004). Putting technology on the road. Research-Technology Management, 47(2), 41–46.  Lizaso, F., & Reger, G. (2004). Linking roadmapping and scenarios as an approach for strategic technology planning. International Journal of Technology Intelligence and Planning, 1(1), 68–86. https://doi.org/10.1504/IJTIP.2004.004928  Phaal, R., Farrukh, C. J. P., & Probert, P. R. (2009). Visualising strategy: A classification of graphical roadmap forms. International Journal of Technology Management, 47(4), 286–305. https://doi.org/10.1504/IJTM.2009.024431  Ricard, L. M., & Borch, K. (2011). From future scenarios to roadmapping: A practical guide to explore innovation and strategy. In The 4th International Seville Conference on Future-Oriented Technology Analysis (FTA). European Commission Joint Research Centre. |
| 7 | **Scenario Matrix (2x2)** (Scenario-Axes Technique) is a 2x2 framework constructed by juxtaposing two critical axes of uncertainty, each representing a key factor with high impact and unpredictability (Schwenker & Wulf, 2013). Each axis reflects two contrasting future outcomes (e.g., positive vs. negative), resulting in four distinct scenarios that explore plausible futures within a specific thematic or geographic context (van der Heijden, 2005). | Rhydderch, A. (2017). Scenario Building: The 2x2 Matrix Technique. Prospective and Strategic Foresight Toolbox. Futuribles International.  Schwenker, B., & Wulf, T. (2013). Scenario-Based Strategic Planning: Developing Strategies in an Uncertain World. Springer Gabler. https://doi.org/10.1007/978-3-658-02875-6  Van der Heijden, K. (2005). Scenarios: The Art of Strategic Conversation (2nd ed.). John Wiley & Sons Ltd. |
| 8 | **Scenario planning**: is a strategic planning method for exploring possible future scenarios and development paths over a medium-term horizon (Schoemaker, 1995). It emphasises understanding complexity and uncertainty, focusing on possible and plausible futures rather than a precise prediction based on extrapolation of existing trends.  By highlighting key trends, drivers and factors that could lead to significant shifts, scenario planning helps executives develop adaptable and more robust strategies to address various contingencies (Schwenker and Wulf, 2013; Martelli, 2014). | Martelli, A. (2014). Models of Scenario Building and Planning: Facing Uncertainty and Complexity. Palgrave Macmillan. https://doi.org/10.1057/9781137293503  Schoemaker, P. J. H. (1995). Scenario planning: A tool for strategic thinking. Sloan Management Review, 37(2), 25–40. MIT Sloan article  Schwenker, B., & Wulf, T. (2013). Scenario-Based Strategic Planning: Developing Strategies in an Uncertain World. Springer Gabler. https://doi.org/10.1007/978-3-658-02875-6 |
| 9 | **SWOT:** is a foundational strategic framework that highlights the interplay between internal *strengths* and *weaknesses* and external *opportunities* and *threats* (Barney, 1995). While useful for initiating analysis of competitive advantage, it offers only a preliminary lens. To gain deeper strategic insight, it must be complemented by rigorous evaluations of competitive dynamics, resource capabilities, financial performance, and organizational structure | Barney, J. B. (1995). Looking inside for competitive advantage. Academy of Management Executive, 9(4), 49–61. |
| 10 | **Three Horizons (3H)** is a futures thinking framework that connects the present with desired futures, helping to identify transitional innovations and disruptions that emerge from tensions between existing systems and visionary aspirations.  It maps change across three overlapping horizons:   1. H1 (Managerial) – The dominant present system focused on continuity. 2. H2 (Entrepreneurial) – A space of innovation and competing logics. 3. H3 (Visionary) – A transformative future shaped by new paradigms.   The method aids strategic dialogue on complex, uncertain problems, encourages future-conscious decision-making, and depicts change more realistically than linear technology roadmaps | Curry, A., & Hodgson, A. (2008). Seeing in multiple horizons: Connecting futures to strategy. Journal of Futures Studies, 13(1), 1–20.  Sharpe, B., & Hodgson, A. (2006). Intelligent Infrastructure Futures: Technology Forward Look. Foresight Directorate, UK Department of Trade & Industry. Government publication  Sharpe, B., Hodgson, A., Leicester, G., Lyon, A., & Fazey, I. (2016). Three horizons: A pathways practice for transformation. Ecology and Society, 21(2), Article 47. https://doi.org/10.5751/ES-08388-210247 |
| 11 | **Verge Framework** (Lum & Bowman, 2004) is a foresight tool that explores how social and technological changes affect human behaviour and experience across five dimensions:   1. **Define**: How people see themselves, their identity and role. 2. **Relate**: How people interact with others, their relationships and social roles. 3. **Connect**: How people understand and experience the world, through technology, media, or sensory engagement. 4. **Create**: How people make and build tools, ideas, or systems. 5. **Consume**: How people acquire, use, and value resources such as goods, information, or services.   Verge helps futurists uncover deeper cultural and emotional dynamics that standard scenario planning might miss. By putting human behaviour at the centre of foresight, it’s especially valuable for designing strategies that resonate on a personal and societal level. | Lum, R., & Bowman, M. (2004). Verge: A General Practice Framework for Foresight Work. Vision Foresight Strategy LLC. Framework overview  Textor, R. B. (1995). The ethnographic futures research method: An application to Thailand. Futures, 27(4), 461–471. https://doi.org/10.1016/0016-3287(95)00010-6 |
| 12 | **Visioning** is the process of collaboratively developing a set of shared aims and objectives for a project, and articulating a compelling image of a preferred future that would result if these aims are successfully realised. It serves as a strategic tool for aligning stakeholders around a common direction and guiding long-term planning.  This practice enables participants to:   1. Envision what success looks like in a future context. 2. Identify the values, policies, strategies, and actions necessary to achieve that future. 3. Foster commitment and coherence across teams or organisations by making abstract goals tangible and time bound. | Bezold, C. (2009). Anticipatory democracy and visioning: Making foresight more democratic. Futures, 41(3), 187–193. https://doi.org/10.1016/j.futures.2008.07.005  Inayatullah, S. (2008). Six pillars: Futures thinking for transforming. Foresight, 10(1), 4–21. https://doi.org/10.1108/14636680810855991 |
| 13 | **Wind Tunnelling** is a foresight method for evaluating the robustness of policy and strategic options against a range of future scenarios (Bradfield et al., 2015). It supports both exploratory and decision-oriented processes whether one-off or ongoing by assessing how well strategies perform under diverse external conditions.  The method involves:   1. Testing strategic assumptions across multiple scenarios 2. Rating or ranking options based on viability, adaptability, and resilience 3. Identifying critical planning moments where strategies may need to be revised, reinforced, or discarded | Bradfield, R., Wright, G., Burt, G., Cairns, G., & van der Heijden, K. (2005). The origins and evolution of scenario techniques in long range business planning. Futures, 37(8), 795–812. https://doi.org/10.1016/j.futures.2005.01.003  Chermack, T. J. (2011). Scenario Planning in Organizations: How to Create, Use, and Assess Scenarios. Berrett-Koehler Publishers.  De Ruijter, P. (2014). Scenario Based Strategy: Navigate the Future. Gower Publishing. https://doi.org/10.4324/9781315607689  van der Heijden, K. (2005). Scenarios: The Art of Strategic Conversation (2nd ed.). John Wiley & Sons Ltd. |
